# Supplementary material for: Kmer-db: instant evolutionary distance estimation
Source: Oxford University Press journal article supplement (doi:10.1093/bioinformatics/bty610), 2018-07-07
Supplement: bioinformatics_35_1_133_s1.pdf [file bioinformatics_35_1_133_s1.pdf]

# 1 Illustration of the data structure

Figures 1–5 show the contents of the Kmer-db data structure after adding successive samples (one per figure). The only parts stored in practice are yellow-headed tables, the remaining are given for clearer presentation. Let us focus at Figure 2 which shows data structure after processing two genomes (“Samples” table). Table “ $k$ -mers” presents all unique  $k$ -mers in these genomes, each assigned with a list of sample ids containing it. E.g., CTGGA is present in samples 0 and 1. The “Templates” table contains all unique lists of sample ids. After processing two samples there are 3 such unique lists, called templates: (0), (1), (0,1).

The “ $k$ -mers to templates” ( $K2T$ ) table is essentially the same as the “ $k$ -kmers” table but lists of sample ids are replaced by template ids. The templates are stored in a compressed way (“compacted templates” table) in which shared parts of the lists of ids are merged. E.g., template 3 contains sample id 1 as well as all sample ids present in its parental template 1.

As was said above, in practice only  $K2T$  and  $CT$  tables (yellow-headed) are stored. The internal representation is as follows:

- “ $k$ -mer to templates” ( $K2T$ ) is a hash table with linear probing (to support fast queries); the entries are:
  - $k$ -mer — 64-bit integer, which allows to store  $k$ -mers up to  $k = 32$ , alternatively, the 64-bit minhash value can be stored here,
  - $t_{id}$  — 64-bit integer pointing to  $CT$  table;
- “compacted templates” ( $CT$ ) is an array of entries:
  - $s_{id}$  — 32-bit integer for sample id,
  - $p_{id}$  — 64-bit integer for id of parent template id,
  - list of Elias-gamma-coded sample ids ( $s_{id}$  list) stored in array of size rounded up to 16 bytes.

| Samples  |             | $k$ -mers |               | Templates |               | $K2T$<br>( $k$ -mers to templates) |          | $CT$<br>(compacted templates) |               |          |
|----------|-------------|-----------|---------------|-----------|---------------|------------------------------------|----------|-------------------------------|---------------|----------|
| $s_{id}$ | Sequence    | $k$ -mer  | $s_{id}$ list | $t_{id}$  | $s_{id}$ list | $k$ -mer                           | $t_{id}$ | $t_{id}$                      | $s_{id}$ list | $p_{id}$ |
| 0        | ACTGGATGCAG | ACTGG     | 0             | 1         | 0             | ACTGG                              | 1        | 1                             | 0             | —        |
|          |             | ATGCA     | 0             |           |               | ATGCA                              | 1        |                               |               |          |
|          |             | CTGGA     | 0             |           |               | CTGGA                              | 1        |                               |               |          |
|          |             | GATGC     | 0             |           |               | GATGC                              | 1        |                               |               |          |
|          |             | GGATG     | 0             |           |               | GGATG                              | 1        |                               |               |          |
|          |             | TGCAG     | 0             |           |               | TGCAG                              | 1        |                               |               |          |
|          |             | TGGAT     | 0             |           |               | TGGAT                              | 1        |                               |               |          |

Figure 1: Database state ( $k = 5$ ) after processing one sample. Symbols:  $s_{id}$ —sample id,  $t_{id}$ —template id,  $p_{id}$ —parent template id.

| Samples  |             | $k$ -mers |               | Templates |               | $K2T$<br>( $k$ -mers to templates) |          | $CT$<br>(compacted templates) |               |          |
|----------|-------------|-----------|---------------|-----------|---------------|------------------------------------|----------|-------------------------------|---------------|----------|
| $s_{id}$ | Sequence    | $k$ -mer  | $s_{id}$ list | $t_{id}$  | $s_{id}$ list | $k$ -mer                           | $t_{id}$ | $t_{id}$                      | $s_{id}$ list | $p_{id}$ |
| 0        | ACTGGATGCAG | ACTGG     | 0             | 1         | 0             | ACTGG                              | 1        | 1                             | 0             | —        |
| 1        | GCTGGATGGAG | ATGCA     | 0             | 2         | 1             | ATGCA                              | 1        | 2                             | 1             | —        |
|          |             | ATGGA     | 1             | 3         | 0, 1          | ATGGA                              | 2        | 3                             | 1             | 1        |
|          |             | CTGGA     | 0, 1          |           |               | CTGGA                              | 3        |                               |               |          |
|          |             | GATGC     | 0             |           |               | GATGC                              | 1        |                               |               |          |
|          |             | GATGG     | 1             |           |               | GATGG                              | 2        |                               |               |          |
|          |             | GCTGG     | 1             |           |               | GCTGG                              | 2        |                               |               |          |
|          |             | GGATG     | 0, 1          |           |               | GGATG                              | 3        |                               |               |          |
|          |             | TGCAG     | 0             |           |               | TGCAG                              | 1        |                               |               |          |
|          |             | TGGAG     | 1             |           |               | TGGAG                              | 2        |                               |               |          |
|          |             | TGGAT     | 0, 1          |           |               | TGGAT                              | 3        |                               |               |          |

Figure 2: Database state ( $k = 5$ ) after processing 2 samples. Symbols:  $s_{id}$ —sample id,  $t_{id}$ —template id,  $p_{id}$ —parent template id.

| Samples  |             | $k$ -mers |               | Templates |               | $K2T$<br>( $k$ -mers to templates) |          | $CT$<br>(compacted templates) |               |          |
|----------|-------------|-----------|---------------|-----------|---------------|------------------------------------|----------|-------------------------------|---------------|----------|
| $s_{id}$ | Sequence    | $k$ -mer  | $s_{id}$ list | $t_{id}$  | $s_{id}$ list | $k$ -mer                           | $t_{id}$ | $t_{id}$                      | $s_{id}$ list | $p_{id}$ |
| 0        | ACTGGATGCAG | ACTGG     | 0, 2          | 1         | 0             | ACTGG                              | 4        | 1                             | 0             | —        |
| 1        | GCTGGATGGAG | ATGCA     | 0             | 2         | 1             | ATGCA                              | 1        | 2                             | 1             | —        |
| 2        | ACTGGATGGAG | ATGGA     | 1, 2          | 3         | 0, 1, 2       | ATGGA                              | 5        | 3                             | 1, 2          | 1        |
|          |             | CTGGA     | 0, 1, 2       | 4         | 0, 2          | CTGGA                              | 3        | 4                             | 2             | 1        |
|          |             | GATGC     | 0             | 5         | 1, 2          | GATGC                              | 1        | 5                             | 2             | 2        |
|          |             | GATGG     | 1, 2          |           |               | GATGG                              | 5        |                               |               |          |
|          |             | GCTGG     | 1             |           |               | GCTGG                              | 2        |                               |               |          |
|          |             | GGATG     | 0, 1, 2       |           |               | GGATG                              | 3        |                               |               |          |
|          |             | TGCAG     | 0             |           |               | TGCAG                              | 1        |                               |               |          |
|          |             | TGGAG     | 1, 2          |           |               | TGGAG                              | 5        |                               |               |          |
|          |             | TGGAT     | 0, 1, 2       |           |               | TGGAT                              | 3        |                               |               |          |

Figure 3: Database state ( $k = 5$ ) after processing 3 samples. Symbols:  $s_{id}$ —sample id,  $t_{id}$ —template id,  $p_{id}$ —parent template id.

| Samples  |             | $k$ -mers |               | Templates |               | $K2T$<br>( $k$ -mers to templates) |          | $CT$<br>(compacted templates) |               |          |
|----------|-------------|-----------|---------------|-----------|---------------|------------------------------------|----------|-------------------------------|---------------|----------|
| $s_{id}$ | Sequence    | $k$ -mer  | $s_{id}$ list | $t_{id}$  | $s_{id}$ list | $k$ -mer                           | $t_{id}$ | $t_{id}$                      | $s_{id}$ list | $p_{id}$ |
| 0        | ACTGGATGCAG | ACTGG     | 0, 2          | 1         | 0             | ACTGG                              | 4        | 1                             | 0             | —        |
| 1        | GCTGGATGGAG | AGTTG     | 3             | 2         | 1             | AGTTG                              | 7        | 2                             | 1             | —        |
| 2        | ACTGGATGGAG | ATGCA     | 0, 3          | 3         | 0, 1, 2       | ATGCA                              | 6        | 3                             | 1, 2          | 1        |
| 3        | ATGCAGTTGGT | ATGGA     | 1, 2          | 4         | 0, 2          | ATGGA                              | 5        | 4                             | 2             | 1        |
|          |             | CAGTT     | 3             | 5         | 1, 2          | CAGTT                              | 7        | 5                             | 2             | 2        |
|          |             | CTGGA     | 0, 1, 2       | 6         | 0, 3          | CTGGA                              | 3        | 6                             | 3             | 1        |
|          |             | GATGC     | 0             | 7         | 3             | GATGC                              | 1        | 7                             | 3             | —        |
|          |             | GATGG     | 1, 2          |           |               | GATGG                              | 5        |                               |               |          |
|          |             | GCAGT     | 3             |           |               | GCAGT                              | 7        |                               |               |          |
|          |             | GCTGG     | 1             |           |               | GCTGG                              | 2        |                               |               |          |
|          |             | GGATG     | 0, 1, 2       |           |               | GGATG                              | 3        |                               |               |          |
|          |             | GTTGG     | 3             |           |               | GTTGG                              | 7        |                               |               |          |
|          |             | TGCAG     | 0, 3          |           |               | TGCAG                              | 6        |                               |               |          |
|          |             | TGGAG     | 1, 2          |           |               | TGGAG                              | 5        |                               |               |          |
|          |             | TGGAT     | 0, 1, 2       |           |               | TGGAT                              | 3        |                               |               |          |
|          |             | TTGGT     | 3             |           |               | TTGGT                              | 7        |                               |               |          |

Figure 4: Database state ( $k = 5$ ) after processing 4 samples. Symbols:  $s_{id}$ —sample id,  $t_{id}$ —template id,  $p_{id}$ —parent template id.

| Samples                |             | <i>k</i> -mers |                             | Templates              |                             | <i>K2T</i><br>( <i>k</i> -mers to templates) |                        | <i>CT</i><br>(compacted templates) |                             |                        |
|------------------------|-------------|----------------|-----------------------------|------------------------|-----------------------------|----------------------------------------------|------------------------|------------------------------------|-----------------------------|------------------------|
| <i>s</i> <sub>id</sub> | Sequence    | <i>k</i> -mer  | <i>s</i> <sub>id</sub> list | <i>t</i> <sub>id</sub> | <i>s</i> <sub>id</sub> list | <i>k</i> -mer                                | <i>t</i> <sub>id</sub> | <i>t</i> <sub>id</sub>             | <i>s</i> <sub>id</sub> list | <i>p</i> <sub>id</sub> |
| 0                      | ACTGGATGCAG | ACTGG          | 0, 2                        | 1                      | 0                           | ACTGG                                        | 4                      | 1                                  | 0                           | —                      |
| 1                      | GCTGGATGGAG | AGTTG          | 3, 4                        | 2                      | 1                           | AGTTG                                        | 7                      | 2                                  | 1                           | —                      |
| 2                      | ACTGGATGGAG | ATGCA          | 0, 3                        | 3                      | 0, 1, 2                     | ATGCA                                        | 6                      | 3                                  | 1, 2                        | 1                      |
| 3                      | ATGCAGTTGGT | ATGGA          | 1, 2                        | 4                      | 0, 2                        | ATGGA                                        | 5                      | 4                                  | 2                           | 1                      |
| 4                      | CGCAGTTGGT  | CAGTT          | 3, 4                        | 5                      | 1, 2                        | CAGTT                                        | 7                      | 5                                  | 2                           | 2                      |
|                        |             | CGCAG          | 4                           | 6                      | 0, 3                        | CGCAG                                        | 8                      | 6                                  | 3                           | 1                      |
|                        |             | CTGGA          | 0, 1, 2                     | 7                      | 3, 4                        | CTGGA                                        | 3                      | 7                                  | 3, 4                        | —                      |
|                        |             | GATGC          | 0                           | 8                      | 4                           | GATGC                                        | 1                      | 8                                  | 4                           | —                      |
|                        |             | GATGG          | 1, 2                        |                        |                             | GATGG                                        | 5                      |                                    |                             |                        |
|                        |             | GCAGT          | 3, 4                        |                        |                             | GCAGT                                        | 7                      |                                    |                             |                        |
|                        |             | GCTGG          | 1                           |                        |                             | GCTGG                                        | 2                      |                                    |                             |                        |
|                        |             | GGATG          | 0, 1, 2                     |                        |                             | GGATG                                        | 3                      |                                    |                             |                        |
|                        |             | GTTGG          | 3, 4                        |                        |                             | GTTGG                                        | 7                      |                                    |                             |                        |
|                        |             | TGCAG          | 0, 3                        |                        |                             | TGCAG                                        | 6                      |                                    |                             |                        |
|                        |             | TGGAG          | 1, 2                        |                        |                             | TGGAG                                        | 5                      |                                    |                             |                        |
|                        |             | TGGAT          | 0, 1, 2                     |                        |                             | TGGAT                                        | 3                      |                                    |                             |                        |
|                        |             | TTGGT          | 3, 4                        |                        |                             | TTGGT                                        | 7                      |                                    |                             |                        |

Figure 5: Database state ( $k = 5$ ) after processing 5 samples. Symbols:  $s_{id}$ —sample id,  $t_{id}$ —template id,  $p_{id}$ —parent template id.

## 2 Examined programs

The following programs were used in the experimental part. The running parameters are also given.

- Mash v. 2.0:

Mash was downloaded from <https://github.com/marbl/Mash/releases>.

- To perform all-to-all comparison we run Mash with the following commands:

```
mash sketch -p <threads> -k <k> -s <sketch_size> -o reference -l <list_of_fasta>
mash dist -p <threads> -t reference.msh reference.msh > table
```

- To perform one-to-all comparison we run Mash with the following commands:

```
mash sketch -p <threads> -k <k> -s <sketch_size> -o reference.fastq -l <list_of_fastq>
mash dist -p <threads> -t reference.msh reference_fastq.msh > table
```

- Kmer-db v. 1.1 with KMC v. 3.0.1:

Kmer-db was downloaded from <https://github.com/refresh-bio/kmer-db>

KMC was downloaded from <https://github.com/refresh-bio/KMC>.

- To perform all-to-all comparison we run Kmer-db with the following commands:

```
kmer-db-1.1 build -k <k> <list_of_fasta> kmers_build
kmer-db-1.1 all2all kmers_build matrix
```

- To perform one-to-all comparison we run Kmer-db with the following commands:

```
kmc -k<k> -r -ci5 -fq <fastq_file_name> fastq_db tmp
kmer-db-1.1 build -k <k> <list_of_fasta> kmers_build
kmer-db-1.1 one2all kmers_build fastq_db vector
```

- To perform all-to-all comparison with  $k$ -mer filtration we run Kmer-db with the following commands:

```
kmer-db-1.1 build -f <filter_value> -k <k> <list_of_fasta> kmers_build
kmer-db-1.1 all2all kmers_build matrix
```

- To perform one-to-all comparison with  $k$ -mer filtration we run Kmer-db with the following commands:

```
kmc -k<k> -r -ci5 -fq <fastq_file_name> fastq_db tmp
kmer-db-1.1 build -f <filter_value> -k <k> <list_of_fasta> kmers_build
kmer-db-1.1 one2all kmers_build fastq_db vector
```

The algorithms parameters were:

- `threads` – number of threads (48),
- `k` –  $k$ -mer length (20),
- `list_of_fasta` – file containing names of genome files listed in a specified order,
- `fastq_file_name` – name of a file with reads (Kmer-db),
- `filter_value` – threshold for  $k$ -mers filtering (Kmer-db),
- `list_of_fastq` – file containing name of a file with reads (Mash),
- `sketch_size` – sketch size (Mash).

## 3 Datasets

### 3.1 Complete genomes

As a set of genomes we used 40,715 FASTA files downloaded from <https://www.ncbi.nlm.nih.gov/pathogens/> (all assembled genomes available to download on Nov 14, 2017). The complete list of file names can be found at <https://github.com/refresh-bio/kmer-db>. This set was used to prepare the database and run the *all2all* mode.

### 3.2 Sequenced reads

The datasets for *one2all* tests were downloaded also from <https://www.ncbi.nlm.nih.gov/pathogens/> with fastq-dump. The accession numbers are given in Table 1. We used a single sample for each species.

Table 1: *one2all* mode datasets accession numbers

| Pathogen name                   | Reads accession numbers |
|---------------------------------|-------------------------|
| Salmonella enterica             | SRR3219070              |
| E.coli and Shigella             | SRR5385225              |
| Listeria monocytogenes          | SRR974852               |
| Campylobacter jejuni            | SRR4106490              |
| Mycobacterium tuberculosis      | ERR133980               |
| Klebsiella pneumoniae           | SRR5666403              |
| Acinetobacter baumannii         | SRR2558787              |
| Neisseria                       | SRR969389               |
| Pseudomonas aeruginosa          | SRR001657 SRR001656     |
| Enterobacter                    | SRR005471               |
| Clostridioides difficile        | ERR1015522              |
| Vibrio parahaemolyticus         | SRR873695               |
| Legionella pneumophila          | ERR376714               |
| Serratia marcescens             | SRR3927534              |
| Klebsiella oxytoca              | SRR2965664              |
| Cronobacter                     | SRR1771714              |
| Citrobacter freundii            | SRR1631758              |
| Elizabethkingia anophelis       | SRR3105503              |
| Staphylococcus pseudintermedius | SRR5875113              |
| Providencia alcalifaciens       | SRR036284               |
| Morganella morganii             | SRR1919351              |
| Kluyvera intermedia             | SRR2965721              |

## 4 Environment

The computer used in test was of the following configuration:

- 2 Intel Xeon E5-2670 v3 CPUs, 12 double-threaded cores per CPU, each clocked at 2.3 GHz,
- 256 GiB RAM,
- 6 HDDs of size 1 TiB each in RAID-5 configuration, `hdparm -t` reported buffered read speed 528.45 MB/s.

For compilation we used G++ v. 7.2.0. The machine was running Debian 9.3.1 x86-64 OS.

## 5 Additional results

Table 3 shows detailed results of construction of Kmer-db database and calculation of distance matrix for  $k$ -mer size  $k = 20$ . The meaning of the columns is as follows:

- No. samp. — number of samples in the input dataset.
- *build* processing time — time of construction of Kmer-db database from assembled genomes. This stage is necessary if we want to include new genomes to the analysis.
- *all2all* processing time — time of calculation of the distance matrix from Kmer-db database. This stage is also necessary when we include new genomes to the analysis.
- total processing time — total time of determination of the distance matrix from the genomes (*build* + *all2all*).
- RAM [GB] — maximal amount of memory allocated in the analysis stages (build, all2all). The amount of memory in KMC stage is much smaller.
- No.  $k$ -mers [M] — total number of unique  $k$ -mers (expressed in millions) in all input genomes.
- No. temp. [M] — total number of templates (expressed in millions) in Kmer-db database.
- Sum of cells [G] — sum of all cells in the output (triangular) distance matrix (expressed in billions). This says exactly how many single additions must be made by any naive algorithm that compares samples in pairs  $k$ -mer by  $k$ -mer.
- No. of add. [G] — total number of additions made by Kmer-db. This value is smaller than “sum of cells” since Kmer-db increments the counter by number of  $k$ -mers pointing to a single template.

The cause of a stepped increase of RAM usage for growing number of samples in the input set is the internal representation. For datasets examined in the article the *K2T* table dominates the memory usage. It is implemented as a hash table with linear probing of size being a power of 2. Thus, when the filling factor achieves the limit (by default set to 0.8) the size of the hash table is doubled. This can be observed for 2,000 samples and 10,000 samples).

Table 4 shows similar information, but the input sets of  $k$ -mers were filtered using minhash to retain desired fraction of elements (similarly as made by Mash). There is a single additional column:

- minhash processing time — time necessary to filter the KMC databases. This stage is made only once for each assembled genome, so we do not include the time in the total time of analyses.



Table 2: Mean absolute error (MAE) of Mash distance estimation w.r.t. actual Mash distance (calculated on the basis of all  $k$ -mers). Evaluation was done on the set of 500 *E. coli* genomes from Ondov et al (2016) study.

| Mash    |          | Kmer-db  |          |
|---------|----------|----------|----------|
| sketch  | error    | fraction | error    |
| 1,000   | 0.001053 | 0.02%    | 0.000930 |
| 10,000  | 0.000442 | 0.2%     | 0.000269 |
| 100,000 | 0.000122 | 2%       | 0.000124 |

Table 3: Detailed results of running the *build* and *all2all* modes for various orderings of input data and various numbers of samples in the input set

| No. samp.                                | Processing time [h:mm:ss] |                |         | RAM [GB] | No. $k$ -mers [M] | No. temp. [M] | Sum of cells [G] | No. of add. [G] |
|------------------------------------------|---------------------------|----------------|---------|----------|-------------------|---------------|------------------|-----------------|
|                                          | <i>build</i>              | <i>all2all</i> | total   |          |                   |               |                  |                 |
| <b>Species tax id ordering (default)</b> |                           |                |         |          |                   |               |                  |                 |
| 1,000                                    | 0:04:21                   | 0:00:15        | 0:04:36 | 15.2     | 361               | 7.8           | 307              | 42              |
| 2,000                                    | 0:07:22                   | 0:00:24        | 0:07:46 | 27.9     | 459               | 12.8          | 1,395            | 246             |
| 5,000                                    | 0:15:00                   | 0:01:33        | 0:16:33 | 28.8     | 678               | 26.7          | 8,540            | 2,201           |
| 10,000                                   | 0:30:09                   | 0:03:40        | 0:33:49 | 55.2     | 860               | 40.3          | 28,400           | 6,537           |
| 20,000                                   | 0:52:25                   | 0:13:10        | 1:05:35 | 57.4     | 1,039             | 58.8          | 107,256          | 28,280          |
| 40,715                                   | 1:32:05                   | 1:27:19        | 2:59:24 | 60.7     | 1,406             | 97.3          | 412,913          | 164,102         |
| <b>Lexicographical ordering</b>          |                           |                |         |          |                   |               |                  |                 |
| 1,000                                    | 0:04:25                   | 0:00:16        | 0:04:41 | 14.8     | 361               | 8.1           | 307              | 56              |
| 2,000                                    | 0:07:02                   | 0:00:30        | 0:07:32 | 27.8     | 459               | 13.4          | 1,395            | 323             |
| 5,000                                    | 0:14:21                   | 0:01:56        | 0:16:17 | 27.8     | 678               | 27.7          | 8,540            | 2,631           |
| 10,000                                   | 0:27:11                   | 0:04:48        | 0:31:59 | 56.2     | 860               | 41.8          | 28,400           | 7,573           |
| 20,000                                   | 0:46:43                   | 0:18:06        | 1:04:49 | 56.2     | 1,039             | 60.7          | 107,256          | 31,457          |
| 40,715                                   | 1:26:17                   | 1:53:01        | 3:19:18 | 57.4     | 1,406             | 99.9          | 412,913          | 175,133         |
| <b>Random ordering</b>                   |                           |                |         |          |                   |               |                  |                 |
| 1,000                                    | 0:04:13                   | 0:00:15        | 0:04:28 | 14.8     | 361               | 8.4           | 307              | 53              |
| 2,000                                    | 0:07:08                   | 0:00:30        | 0:07:38 | 28.0     | 459               | 13.8          | 1,395            | 296             |
| 5,000                                    | 0:14:53                   | 0:02:09        | 0:17:02 | 28.3     | 678               | 28.4          | 8,540            | 2,577           |
| 10,000                                   | 0:29:55                   | 0:06:12        | 0:36:07 | 59.1     | 860               | 42.7          | 28,400           | 7,608           |
| 20,000                                   | 0:49:55                   | 0:26:24        | 1:16:19 | 60.6     | 1,039             | 62.2          | 107,256          | 31,272          |
| 40,715                                   | 1:29:57                   | 2:58:50        | 4:28:47 | 79.6     | 1,406             | 102.3         | 412,913          | 180,729         |
| <b>Tax id. ordering</b>                  |                           |                |         |          |                   |               |                  |                 |
| 1,000                                    | 0:04:13                   | 0:00:15        | 0:04:28 | 14.8     | 361               | 8.1           | 307              | 56              |
| 2,000                                    | 0:07:02                   | 0:00:30        | 0:07:32 | 27.8     | 459               | 13.3          | 1,395            | 317             |
| 5,000                                    | 0:14:32                   | 0:01:53        | 0:16:25 | 27.9     | 678               | 27.4          | 8,540            | 2,626           |
| 10,000                                   | 0:28:48                   | 0:04:36        | 0:33:24 | 56.1     | 860               | 41.5          | 28,400           | 7,664           |
| 20,000                                   | 0:51:10                   | 0:13:14        | 1:04:24 | 56.3     | 1,039             | 60.4          | 107,256          | 28,828          |
| 40,715                                   | 1:33:04                   | 1:23:06        | 2:56:10 | 59.3     | 1,406             | 99.6          | 412,913          | 169,859         |

Table 4: Detailed results of running the *build* and *all2all* modes for various sizes of minhash filter (preserving from 0.0002 to 0.1 of input *k*-mers). Species tax id ordering was used here.

| No. samp.              | Processing time [mm:ss] |                |       | RAM [GB] | No. <i>k</i> -mers [K] | No. temp. [K] | Sum of cells [M] | No. of add. [M] |
|------------------------|-------------------------|----------------|-------|----------|------------------------|---------------|------------------|-----------------|
|                        | <i>build</i>            | <i>all2all</i> | total |          |                        |               |                  |                 |
| <b>fraction 0.0002</b> |                         |                |       |          |                        |               |                  |                 |
| 1,000                  | 00:08                   | 00:00          | 00:08 | 1.3      | 73                     | 20            | 63               | 51              |
| 2,000                  | 00:17                   | 00:01          | 00:18 | 1.4      | 92                     | 28            | 284              | 249             |
| 5,000                  | 00:40                   | 00:01          | 00:41 | 1.4      | 136                    | 51            | 1,740            | 1,632           |
| 10,000                 | 01:14                   | 00:05          | 01:19 | 1.4      | 173                    | 73            | 5,762            | 4,825           |
| 20,000                 | 02:23                   | 00:15          | 02:38 | 1.4      | 208                    | 99            | 21,661           | 19,345          |
| 40,715                 | 05:06                   | 01:03          | 06:09 | 3.2      | 282                    | 151           | 83,515           | 80,104          |
| <b>fraction 0.001</b>  |                         |                |       |          |                        |               |                  |                 |
| 1,000                  | 00:16                   | 00:00          | 00:16 | 1.4      | 361                    | 77            | 304              | 231             |
| 2,000                  | 00:19                   | 00:01          | 00:20 | 1.4      | 459                    | 113           | 1,382            | 1,165           |
| 5,000                  | 00:49                   | 00:02          | 00:51 | 1.4      | 679                    | 204           | 8,480            | 7,775           |
| 10,000                 | 01:18                   | 00:05          | 01:23 | 1.5      | 861                    | 291           | 28,382           | 22,769          |
| 20,000                 | 02:19                   | 00:18          | 02:37 | 1.5      | 1,039                  | 402           | 107,033          | 92,924          |
| 40,715                 | 04:33                   | 01:13          | 05:46 | 3.3      | 1,408                  | 617           | 410,979          | 389,500         |
| <b>fraction 0.002</b>  |                         |                |       |          |                        |               |                  |                 |
| 1,000                  | 00:07                   | 00:00          | 00:07 | 1.3      | 723                    | 138           | 610              | 444             |
| 2,000                  | 00:14                   | 00:01          | 00:15 | 1.4      | 918                    | 206           | 2,774            | 2,267           |
| 5,000                  | 00:37                   | 00:02          | 00:39 | 1.4      | 1,359                  | 373           | 17,004           | 15,361          |
| 10,000                 | 01:13                   | 00:06          | 01:19 | 1.5      | 1,722                  | 533           | 56,695           | 44,473          |
| 20,000                 | 02:27                   | 00:20          | 02:47 | 1.5      | 2,080                  | 737           | 214,128          | 182,617         |
| 40,715                 | 04:58                   | 01:25          | 06:23 | 3.4      | 2,816                  | 1,136         | 823,034          | 774,167         |
| <b>fraction 0.005</b>  |                         |                |       |          |                        |               |                  |                 |
| 1,000                  | 00:09                   | 00:01          | 00:10 | 1.5      | 1,807                  | 298           | 1,528            | 1,062           |
| 2,000                  | 00:19                   | 00:01          | 00:20 | 1.4      | 2,294                  | 453           | 6,944            | 5,470           |
| 5,000                  | 00:54                   | 00:03          | 00:57 | 1.6      | 3,393                  | 826           | 42,536           | 37,545          |
| 10,000                 | 01:47                   | 00:07          | 01:54 | 1.7      | 4,300                  | 1,179         | 141,717          | 107,412         |
| 20,000                 | 03:21                   | 00:27          | 03:48 | 1.7      | 5,195                  | 1,641         | 535,362          | 443,478         |
| 40,715                 | 07:38                   | 01:57          | 09:35 | 3.7      | 7,031                  | 2,540         | 2,060,379        | 1,908,860       |
| <b>fraction 0.01</b>   |                         |                |       |          |                        |               |                  |                 |
| 1,000                  | 00:14                   | 00:01          | 00:15 | 1.5      | 3,612                  | 530           | 3,069            | 2,035           |
| 2,000                  | 00:30                   | 00:01          | 00:31 | 1.6      | 4,587                  | 818           | 13,949           | 10,563          |
| 5,000                  | 01:19                   | 00:04          | 01:23 | 1.8      | 6,785                  | 1,500         | 85,402           | 73,612          |
| 10,000                 | 02:42                   | 00:11          | 02:53 | 1.9      | 8,602                  | 2,138         | 284,076          | 208,714         |
| 20,000                 | 05:03                   | 00:38          | 05:41 | 2.0      | 10,392                 | 2,988         | 1,073,244        | 862,904         |
| 40,715                 | 10:56                   | 02:53          | 13:49 | 4.3      | 14,063                 | 4,648         | 4,132,467        | 3,766,741       |
| <b>fraction 0.002</b>  |                         |                |       |          |                        |               |                  |                 |
| 1,000                  | 00:18                   | 00:01          | 00:19 | 1.7      | 7,228                  | 926           | 6,148            | 3,810           |
| 2,000                  | 00:35                   | 00:02          | 00:37 | 1.8      | 9,178                  | 1,450         | 27,967           | 20,018          |
| 5,000                  | 01:33                   | 00:07          | 01:40 | 2.2      | 13,572                 | 2,687         | 171,272          | 142,067         |
| 10,000                 | 03:04                   | 00:17          | 03:21 | 2.4      | 17,206                 | 3,828         | 569,038          | 400,368         |
| 20,000                 | 06:05                   | 00:58          | 07:03 | 2.5      | 20,785                 | 5,372         | 2,147,568        | 1,655,775       |
| 40,715                 | 12:40                   | 04:36          | 17:16 | 5.3      | 28,131                 | 8,403         | 8,273,572        | 7,351,439       |
| <b>fraction 0.05</b>   |                         |                |       |          |                        |               |                  |                 |
| 1,000                  | 00:24                   | 00:02          | 00:26 | 2.0      | 18,071                 | 1,844         | 15,378           | 8,284           |
| 2,000                  | 00:45                   | 00:04          | 00:49 | 2.2      | 22,942                 | 2,943         | 69,936           | 44,333          |
| 5,000                  | 01:49                   | 00:14          | 02:03 | 3.0      | 33,918                 | 5,551         | 428,147          | 325,122         |
| 10,000                 | 03:27                   | 00:33          | 04:00 | 3.3      | 43,002                 | 7,931         | 1,423,932        | 913,123         |
| 20,000                 | 06:49                   | 01:54          | 08:43 | 3.8      | 51,947                 | 11,200        | 5,374,216        | 3,786,495       |
| 40,715                 | 14:04                   | 09:20          | 23:24 | 7.5      | 70,308                 | 17,638        | 20,692,365       | 17,327,899      |
| <b>fraction 0.1</b>    |                         |                |       |          |                        |               |                  |                 |
| 1,000                  | 00:34                   | 00:03          | 00:37 | 2.8      | 36,138                 | 2,920         | 30,692           | 13,965          |
| 2,000                  | 01:00                   | 00:06          | 01:06 | 3.0      | 45,875                 | 4,711         | 139,579          | 76,110          |
| 5,000                  | 02:22                   | 00:22          | 02:44 | 4.4      | 67,825                 | 9,046         | 854,372          | 577,709         |
| 10,000                 | 04:31                   | 00:55          | 05:26 | 4.9      | 85,988                 | 13,012        | 2,841,591        | 1,625,067       |
| 20,000                 | 08:52                   | 03:11          | 12:03 | 5.8      | 103,886                | 18,480        | 10,724,805       | 6,756,069       |
| 40,715                 | 18:03                   | 16:29          | 34:32 | 11.2     | 140,606                | 29,264        | 41,289,544       | 31,989,192      |

Table 5: Detailed results of running the *sketch* and *dist* of Mash

| No. samples                                         | Processing time [h:mm:ss] |             | RAM<br>[GB] |
|-----------------------------------------------------|---------------------------|-------------|-------------|
|                                                     | <i>sketch</i>             | <i>dist</i> |             |
| <b>Sketch size 1,000; lexicographical ordering</b>  |                           |             |             |
| 1,000                                               | 0:00:11                   | 0:00:01     | 0.6         |
| 2,000                                               | 0:00:32                   | 0:00:04     | 0.7         |
| 5,000                                               | 0:01:17                   | 0:00:28     | 0.8         |
| 10,000                                              | 0:02:39                   | 0:01:53     | 0.9         |
| 20,000                                              | 0:04:40                   | 0:07:24     | 1.1         |
| 40,715                                              | 0:09:41                   | 0:30:39     | 1.6         |
| <b>Sketch size 1,000; Species tax id ordering</b>   |                           |             |             |
| 1,000                                               | 0:00:15                   | 0:00:01     | 0.6         |
| 2,000                                               | 0:00:22                   | 0:00:04     | 0.7         |
| 5,000                                               | 0:00:59                   | 0:00:28     | 0.8         |
| 10,000                                              | 0:02:01                   | 0:01:50     | 0.9         |
| 20,000                                              | 0:03:55                   | 0:07:17     | 1.1         |
| 40,715                                              | 0:08:08                   | 0:30:05     | 1.5         |
| <b>Sketch size 10,000; lexicographical ordering</b> |                           |             |             |
| 1,000                                               | 0:00:17                   | 0:00:06     | 0.8         |
| 2,000                                               | 0:00:26                   | 0:00:24     | 1.1         |
| 5,000                                               | 0:01:06                   | 0:02:25     | 1.7         |
| 10,000                                              | 0:02:22                   | 0:09:34     | 2.7         |
| 20,000                                              | 0:04:21                   | 0:37:49     | 4.8         |
| 40,715                                              | 0:08:58                   | 2:37:00     | 9.8         |
| <b>Sketch size 10,000; Species tax id ordering</b>  |                           |             |             |
| 1,000                                               | 0:00:12                   | 0:00:06     | 0.9         |
| 2,000                                               | 0:00:24                   | 0:00:24     | 1.1         |
| 5,000                                               | 0:01:03                   | 0:02:25     | 1.7         |
| 10,000                                              | 0:02:07                   | 0:09:33     | 2.7         |
| 20,000                                              | 0:04:10                   | 0:37:45     | 4.8         |
| 40,715                                              | 0:08:35                   | 2:36:54     | 9.8         |

Table 5 shows the running times of Mash analyses. We used two orderings of the input datasets (lexicographical and species tax id) without significant impact on the processing times. Two sketch sizes were examined: 1,000 (default Mash sketch size) and 10,000 (value used in the NCBI Pathogen Detection). For the examined species 10,000 sketch size is similar to 0.002 fraction in Kmer-db.

The meaning of the columns in the table is as follows:

- No. samples — number of samples in the input set.
- Sketch processing time — time of calculation of sketches. This stage is made only one time, when new genome is added, so we do not include it in the analysis time.
- Dist processing time — time of calculation of matrix of distances for known sketches.
- RAM [GB] — maximum amount of memory allocated in the distance calculation stage.
